# Supplementary material
Source: PubMed Central journal article supplement (PMC3780365)
Supplement: NIHMS496754-supplement-supplement_1.pdf [file NIHMS496754-supplement-supplement_1.pdf]

eTABLE1. Air quality monitoring instrumentation, network and frequency by monitoring station

| AQ Variable                        | Site Location            | Network   | Method                       | Frequency                 |
|------------------------------------|--------------------------|-----------|------------------------------|---------------------------|
| PM <sub>10</sub>                   | Georgia Tech             | AQS       | FRM/TEOM                     | Daily                     |
|                                    | Jefferson Street (ARIES) | SEARCH    | FRM                          | Daily                     |
|                                    | Yorkville                | SEARCH    | FRM                          | Daily                     |
|                                    | Fulton Co. Health Dept.  | AQS       | FRM                          | Every 6 <sup>th</sup> day |
|                                    | Fire Station #8          | AQS       | FRM                          | Every 6 <sup>th</sup> day |
|                                    | Doraville Health Center  | AQS       | FRM                          | Every 6 <sup>th</sup> day |
|                                    | Griffin                  | AQS       | FRM                          | Every 6 <sup>th</sup> day |
|                                    | Douglasville             | AQS       | FRM                          | Every 6 <sup>th</sup> day |
| E. Rivers School                   | AQS                      | FRM       | Every 6 <sup>th</sup> day    |                           |
| PM <sub>2.5</sub>                  | Doraville Health Center  | AQS       | FRM                          | Daily                     |
|                                    | East Rivers School       | AQS       | FRM                          | Daily                     |
|                                    | South DeKalb             | AQS/ASACA | FRM/TEOM                     | Daily                     |
|                                    | Fort McPherson           | ASACA     | TEOM                         | Daily                     |
|                                    | Tucker                   | ASACA     | TEOM                         | Daily                     |
|                                    | Jefferson Street (ARIES) | SEARCH    | FRM                          | Daily                     |
|                                    | Yorkville                | SEARCH    | FRM                          | Daily                     |
|                                    | Fire Station #8          | AQS       | FRM                          | Every 3 <sup>rd</sup> day |
|                                    | East Point Health Center | AQS       | FRM                          | Every 3 <sup>rd</sup> day |
|                                    | Forest Park              | AQS       | FRM                          | Every 3 <sup>rd</sup> day |
| Kennesaw                           | AQS                      | FRM       | Every 3 <sup>rd</sup> day    |                           |
| PM <sub>2.5-10</sub>               | Jefferson St. (ARIES)    | SEARCH    | Dichotomous Sampler          | Daily                     |
| PM <sub>2.5</sub> sulfate          | Jefferson St. (ARIES)    | SEARCH    | Particle Composition Monitor | Daily                     |
| PM <sub>2.5</sub> nitrate          | Jefferson St. (ARIES)    | SEARCH    | Particle Composition Monitor | Daily                     |
| PM <sub>2.5</sub> total carbon     | Jefferson St. (ARIES)    | SEARCH    | Thermal Optical Reflectance  | Daily                     |
| PM <sub>2.5</sub> elemental carbon | Jefferson St. (ARIES)    | SEARCH    | Thermal Optical Reflectance  | Daily                     |
| PM <sub>2.5</sub> organic carbon   | Jefferson St. (ARIES)    | SEARCH    | Thermal Optical Reflectance  | Daily                     |
| PM <sub>2.5</sub> WS metals        | Jefferson St. (ARIES)    | SEARCH    | Particle Composition Monitor | Daily                     |
| O <sub>3</sub>                     | Confederate Ave.         | AQS       | Chemiluminescence            | Daily (not winter)        |
|                                    | South DeKalb             | AQS       | Chemiluminescence            | Daily (not winter)        |
|                                    | Conyers                  | AQS       | Chemiluminescence            | Daily (not winter)        |
|                                    | Jefferson Street (ARIES) | SEARCH    | UV Absorption                | Daily                     |
|                                    | Yorkville                | SEARCH    | UV Absorption                | Daily                     |
| CO                                 | DeKalb Tech              | AQS       | Infrared analyzer            | Daily                     |
|                                    | Roswell Rd.              | AQS       | Infrared analyzer            | Daily                     |
|                                    | South DeKalb             | AQS       | Infrared analyzer            | Daily                     |
|                                    | Jefferson Street (ARIES) | SEARCH    | Infrared analyzer            | Daily                     |
|                                    | Yorkville                | SEARCH    | Infrared analyzer            | Daily                     |
| SO <sub>2</sub>                    | Confederate Ave.         | AQS       | Fluorescence                 | Daily                     |
|                                    | Georgia Tech             | AQS       | Fluorescence                 | Daily                     |
|                                    | Stilesboro               | AQS       | Fluorescence                 | Daily                     |
|                                    | Jefferson Street (ARIES) | SEARCH    | Fluorescence                 | Daily                     |
|                                    | Yorkville                | SEARCH    | Fluorescence                 | Daily                     |
| NO <sub>2</sub>                    | Georgia Tech             | AQS       | Chemiluminescence            | Daily                     |
|                                    | South DeKalb             | AQS       | Chemiluminescence            | Daily                     |
|                                    | Conyers                  | AQS       | Chemiluminescence            | Daily                     |
|                                    | Tucker                   | AQS       | Chemiluminescence            | Daily                     |
|                                    | Jefferson St. (ARIES)    | SEARCH    | Chemiluminescence            | Daily                     |
|                                    | Yorkville                | SEARCH    | Chemiluminescence            | Daily                     |

AQS = EPA Air Quality System Research and Characterization ASACA= Assessment of Spatial Aerosol Composition in Atlanta SEARCH= Southeastern Aerosol Research and Characterization FRM = Federal Reference Method TEOM = Tapered Element Oscillating Microbalance

eTABLE 2. Descriptive statistics of daily pollution levels and monthly mean levels for the five-county Atlanta metropolitan area using a population-weighted spatial average of available monitors.

| Pollutant                                                           | N*   | Daily Levels  |             | Jan   | Feb   | Mar   | Apr   | May   | Jun   | Jul   | Aug   | Sep   | Oct   | Nov   | Dec   |
|---------------------------------------------------------------------|------|---------------|-------------|-------|-------|-------|-------|-------|-------|-------|-------|-------|-------|-------|-------|
|                                                                     |      | Mean ± SD     | Range       |       |       |       |       |       |       |       |       |       |       |       |       |
| 1-hour max CO (ppm)                                                 | 4017 | 0.89 ± 0.47   | 0.10 - 3.49 | 0.97  | 0.97  | 0.83  | 0.86  | 0.81  | 0.75  | 0.74  | 0.83  | 0.86  | 1.03  | 1.06  | 1.00  |
| 1-hour max NO <sub>2</sub> (ppb)                                    | 4015 | 23 ± 10       | 2 - 97      | 24    | 25    | 25    | 25    | 24    | 21    | 20    | 22    | 21    | 24    | 24    | 24    |
| 1-hour max SO <sub>2</sub> (ppb)                                    | 4001 | 10 ± 9        | 0 - 78      | 14    | 12    | 11    | 9     | 8     | 9     | 11    | 9     | 7     | 9     | 11    | 12    |
| 8-hour max O <sub>3</sub> (ppb)                                     | 4017 | 44 ± 20       | 1 - 115     | 26    | 31    | 42    | 49    | 57    | 56    | 61    | 63    | 52    | 39    | 29    | 24    |
| 24-hr PM <sub>10</sub> (µg/m <sup>3</sup> )                         | 3239 | 24 ± 12       | 3 - 99      | 18    | 20    | 19    | 23    | 25    | 26    | 30    | 31    | 27    | 28    | 23    | 18    |
| 24-hr PM <sub>2.5</sub> (µg/m <sup>3</sup> )                        | 2338 | 16 ± 7        | 3 - 67      | 14    | 14    | 14    | 15    | 16    | 17    | 20    | 22    | 17    | 18    | 17    | 13    |
| 24-hr PM <sub>2.5-10</sub> (µg/m <sup>3</sup> )                     | 2183 | 9.0 ± 5.0     | 0.5 - 50.3  | 6.8   | 7.6   | 8.5   | 10.9  | 10.5  | 8.6   | 9.2   | 9.3   | 9.2   | 11.3  | 9.4   | 6.9   |
| 24-hr PM <sub>2.5</sub> sulfate (µg/m <sup>3</sup> )                | 2135 | 4.9 ± 3.4     | 0.5 - 21.9  | 2.5   | 3.2   | 3.5   | 4.2   | 5.0   | 5.7   | 7.6   | 8.7   | 6.0   | 5.3   | 3.5   | 2.5   |
| 24-hr PM <sub>2.5</sub> nitrate (µg/m <sup>3</sup> )                | 2127 | 1.0 ± 0.8     | 0.0 - 7.4   | 1.8   | 1.8   | 1.2   | 0.8   | 0.6   | 0.6   | 0.5   | 0.6   | 0.6   | 0.9   | 1.2   | 1.6   |
| 24-hr PM <sub>2.5</sub> total carbon (µg/m <sup>3</sup> )           | 2258 | 6.0 ± 3.4     | 0.6 - 33.7  | 6.1   | 5.9   | 5.4   | 5.4   | 5.5   | 5.3   | 5.5   | 6.0   | 5.4   | 7.1   | 7.3   | 6.6   |
| 24-hr PM <sub>2.5</sub> elemental carbon (µg/m <sup>3</sup> )       | 2258 | 1.6 ± 1.2     | 0.1 - 11.9  | 1.6   | 1.6   | 1.4   | 1.3   | 1.4   | 1.4   | 1.4   | 1.7   | 1.5   | 2.3   | 1.9   | 1.8   |
| 24-hr PM <sub>2.5</sub> organic carbon (µg/m <sup>3</sup> )         | 2259 | 4.4 ± 2.4     | 0.4 - 25.9  | 4.5   | 4.3   | 4.0   | 4.1   | 4.1   | 3.9   | 4.0   | 4.3   | 3.9   | 4.9   | 5.3   | 4.8   |
| 24-hr PM <sub>2.5</sub> water-soluble metals † (µg/m <sup>3</sup> ) | 2138 | 0.030 ± 0.023 | 0.003-0.202 | 0.015 | 0.017 | 0.020 | 0.022 | 0.031 | 0.033 | 0.042 | 0.048 | 0.036 | 0.039 | 0.027 | 0.020 |

\*Time period: Gases 1/1/94-12/31/04, PM<sub>10</sub> 1/1/96-12/31/04, PM<sub>2.5</sub> and components 8/1/98-12/31/04

eTABLE 3. Spearman correlation coefficients between four-week average pollutant concentrations in five-county Atlanta.

|                                             | CO    | NO <sub>2</sub> | SO <sub>2</sub> | O <sub>3</sub> | PM <sub>10</sub> | PM <sub>2.5</sub> | CP    | SO <sub>4</sub> | NO <sub>3</sub> | TC   | EC   | OC   | WSMET |
|---------------------------------------------|-------|-----------------|-----------------|----------------|------------------|-------------------|-------|-----------------|-----------------|------|------|------|-------|
| N observations                              | 3806  | 3780            | 3742            | 3806           | 2916             | 1994              | 1734  | 1594            | 1591            | 1951 | 1951 | 1951 | 1604  |
| CO                                          | 1     |                 |                 |                |                  |                   |       |                 |                 |      |      |      |       |
| NO <sub>2</sub>                             | 0.36  | 1               |                 |                |                  |                   |       |                 |                 |      |      |      |       |
| SO <sub>2</sub>                             | 0.44  | 0.37            | 1               |                |                  |                   |       |                 |                 |      |      |      |       |
| O <sub>3</sub>                              | -0.29 | 0.00            | -0.32           | 1              |                  |                   |       |                 |                 |      |      |      |       |
| PM <sub>10</sub>                            | 0.12  | 0.06            | -0.17           | 0.78           | 1                |                   |       |                 |                 |      |      |      |       |
| PM <sub>2.5</sub>                           | 0.07  | 0.05            | -0.12           | 0.67           | 0.91             | 1                 |       |                 |                 |      |      |      |       |
| CP (PM <sub>2.5-10</sub> )                  | 0.31  | 0.26            | -0.17           | 0.48           | 0.71             | 0.53              | 1     |                 |                 |      |      |      |       |
| SO <sub>4</sub> (PM <sub>2.5</sub> sulfate) | -0.16 | -0.15           | -0.22           | 0.83           | 0.82             | 0.87              | 0.34  | 1               |                 |      |      |      |       |
| NO <sub>3</sub> (PM <sub>2.5</sub> nitrate) | 0.35  | 0.51            | 0.66            | -0.68          | -0.38            | -0.26             | -0.36 | -0.52           | 1               |      |      |      |       |
| TC (PM <sub>2.5</sub> total carbon)         | 0.74  | 0.70            | 0.29            | -0.09          | 0.45             | 0.39              | 0.36  | 0.04            | 0.24            | 1    |      |      |       |
| EC (PM <sub>2.5</sub> elemental carbon)     | 0.86  | 0.64            | 0.34            | -0.10          | 0.41             | 0.41              | 0.42  | 0.11            | 0.18            | 0.86 | 1    |      |       |
| OC (PM <sub>2.5</sub> organic carbon)       | 0.59  | 0.66            | 0.24            | -0.07          | 0.42             | 0.34              | 0.28  | 0.01            | 0.24            | 0.96 | 0.69 | 1    |       |
| WSMET (PM <sub>2.5</sub> WS metals)         | -0.01 | -0.15           | -0.25           | 0.59           | 0.73             | 0.69              | 0.44  | 0.76            | -0.53           | 0.12 | 0.25 | 0.05 | 1     |

Time period: gases 9/15/1993-2/15/2004 (3806 days), PM<sub>10</sub> 1/1/1996-2/15/2004 (2968 days), PM<sub>2.5</sub> and components 9/1/1998-2/15/2004 (1994 days)

eTABLE 4. Spearman correlation coefficients between one-week average pollutant concentrations in five-county Atlanta.

|                                             | CO    | NO <sub>2</sub> | SO <sub>2</sub> | O <sub>3</sub> | PM <sub>10</sub> | PM <sub>2.5</sub> | CP    | SO <sub>4</sub> | NO <sub>3</sub> | TC   | EC   | OC   | WSMET |
|---------------------------------------------|-------|-----------------|-----------------|----------------|------------------|-------------------|-------|-----------------|-----------------|------|------|------|-------|
| N observations                              | 3834  | 3827            | 3802            | 3834           | 3017             | 2111              | 1889  | 1782            | 1781            | 2007 | 2007 | 2013 | 1789  |
| CO                                          | 1     |                 |                 |                |                  |                   |       |                 |                 |      |      |      |       |
| NO <sub>2</sub>                             | 0.49  | 1               |                 |                |                  |                   |       |                 |                 |      |      |      |       |
| SO <sub>2</sub>                             | 0.27  | 0.42            | 1               |                |                  |                   |       |                 |                 |      |      |      |       |
| O <sub>3</sub>                              | -0.08 | 0.22            | -0.11           | 1              |                  |                   |       |                 |                 |      |      |      |       |
| PM <sub>10</sub>                            | 0.38  | 0.43            | 0.10            | 0.69           | 1                |                   |       |                 |                 |      |      |      |       |
| PM <sub>2.5</sub>                           | 0.37  | 0.39            | 0.11            | 0.62           | 0.91             | 1                 |       |                 |                 |      |      |      |       |
| CP (PM <sub>2.5-10</sub> )                  | 0.40  | 0.45            | 0.07            | 0.46           | 0.74             | 0.53              | 1     |                 |                 |      |      |      |       |
| SO <sub>4</sub> (PM <sub>2.5</sub> sulfate) | 0.03  | 0.04            | -0.07           | 0.73           | 0.77             | 0.84              | 0.33  | 1               |                 |      |      |      |       |
| NO <sub>3</sub> (PM <sub>2.5</sub> nitrate) | 0.27  | 0.34            | 0.38            | -0.50          | -0.12            | 0.01              | -0.17 | -0.26           | 1               |      |      |      |       |
| TC (PM <sub>2.5</sub> total carbon)         | 0.74  | 0.74            | 0.27            | 0.13           | 0.61             | 0.54              | 0.49  | 0.21            | 0.22            | 1    |      |      |       |
| EC (PM <sub>2.5</sub> elemental carbon)     | 0.82  | 0.66            | 0.33            | 0.08           | 0.54             | 0.52              | 0.47  | 0.23            | 0.20            | 0.87 | 1    |      |       |
| OC (PM <sub>2.5</sub> organic carbon)       | 0.62  | 0.70            | 0.22            | 0.14           | 0.58             | 0.51              | 0.45  | 0.17            | 0.21            | 0.97 | 0.72 | 1    |       |
| WSMET (PM <sub>2.5</sub> WS metals)         | 0.25  | 0.16            | 0.00            | 0.55           | 0.73             | 0.70              | 0.48  | 0.73            | -0.27           | 0.36 | 0.42 | 0.29 | 1     |

Time period: gases 1/1/94-6/30/2004 (3834 days), PM<sub>10</sub> 2/1/1996-6/30/04 (3073 days), PM<sub>2.5</sub> and components 9/1/1998-6/30/2004 (2130 days)

eTABLE 5. Spearman correlation coefficients between six-week average pollutant concentrations in five-county Atlanta.

|                                             | CO    | NO <sub>2</sub> | SO <sub>2</sub> | O <sub>3</sub> | PM <sub>10</sub> | PM <sub>2.5</sub> | CP    | SO <sub>4</sub> | NO <sub>3</sub> | TC   | EC   | OC    | WSMET |
|---------------------------------------------|-------|-----------------|-----------------|----------------|------------------|-------------------|-------|-----------------|-----------------|------|------|-------|-------|
| N observations                              | 3834  | 3834            | 3736            | 3834           | 2976             | 2130              | 1731  | 1533            | 1531            | 2047 | 2047 | 2047  | 1540  |
| CO                                          | 1     |                 |                 |                |                  |                   |       |                 |                 |      |      |       |       |
| NO <sub>2</sub>                             | 0.31  | 1               |                 |                |                  |                   |       |                 |                 |      |      |       |       |
| SO <sub>2</sub>                             | 0.42  | 0.34            | 1               |                |                  |                   |       |                 |                 |      |      |       |       |
| O <sub>3</sub>                              | -0.33 | -0.07           | -0.39           | 1              |                  |                   |       |                 |                 |      |      |       |       |
| PM <sub>10</sub>                            | 0.16  | 0.10            | -0.18           | 0.76           | 1                |                   |       |                 |                 |      |      |       |       |
| PM <sub>2.5</sub>                           | 0.26  | 0.13            | -0.05           | 0.68           | 0.91             | 1                 |       |                 |                 |      |      |       |       |
| CP (PM <sub>2.5-10</sub> )                  | 0.30  | 0.23            | -0.25           | 0.50           | 0.69             | 0.51              | 1     |                 |                 |      |      |       |       |
| SO <sub>4</sub> (PM <sub>2.5</sub> sulfate) | -0.08 | -0.27           | -0.31           | 0.83           | 0.83             | 0.88              | 0.34  | 1               |                 |      |      |       |       |
| NO <sub>3</sub> (PM <sub>2.5</sub> nitrate) | 0.40  | 0.53            | 0.68            | -0.69          | -0.47            | -0.30             | -0.40 | -0.54           | 1               |      |      |       |       |
| TC (PM <sub>2.5</sub> total carbon)         | 0.77  | 0.69            | 0.28            | -0.12          | 0.38             | 0.36              | 0.32  | -0.04           | 0.26            | 1    |      |       |       |
| EC (PM <sub>2.5</sub> elemental carbon)     | 0.90  | 0.61            | 0.34            | -0.08          | 0.40             | 0.46              | 0.41  | 0.18            | 0.20            | 0.85 | 1    |       |       |
| OC (PM <sub>2.5</sub> organic carbon)       | 0.58  | 0.64            | 0.21            | -0.13          | 0.32             | 0.25              | 0.22  | -0.15           | 0.26            | 0.95 | 0.64 | 1     |       |
| WSMET (PM <sub>2.5</sub> WS metals)         | 0.11  | -0.19           | -0.28           | 0.61           | 0.73             | 0.73              | 0.42  | 0.80            | -0.47           | 0.10 | 0.36 | -0.07 | 1     |

Time period: gases 1/1/94-6/30/2004 (3834 days), PM<sub>10</sub> 2/1/1996-6/30/04 (3073 days), PM<sub>2.5</sub> and components 9/1/1998-6/30/2004 (2130 days)

eTABLE 6. Monitor-specific risk ratio and 95% confidence intervals\* for preterm birth for births within four miles of the station†

| Pollutant Monitor                               | Dates of Operation | First month of gestation |        | Final week of gestation |        | Final 6 weeks of gestation |        |
|-------------------------------------------------|--------------------|--------------------------|--------|-------------------------|--------|----------------------------|--------|
|                                                 |                    | RR (95% CI)              | pvalue | RR (95% CI)             | pvalue | RR (95% CI)                | pvalue |
| CO DeKalb Tech                                  | 9/93- 6/03         | 0.97 (0.92, 1.01)        | 0.13   | 1.03 (1.00, 1.06)       | 0.07   | 1.06 (0.99, 1.13)          | 0.08   |
| CO Roswell Rd.                                  | 8/94-12/04         | 0.98 (0.90, 1.06)        | 0.58   | 0.98 (0.93, 1.03)       | 0.33   | 0.94 (0.85, 1.05)          | 0.26   |
| CO Jefferson St.                                | 8/98-12/04         | 1.02 (0.96, 1.07)        | 0.53   | 1.01 (0.98, 1.05)       | 0.53   | 0.99 (0.93, 1.06)          | 0.83   |
| NO <sub>2</sub> Georgia Tech                    | 9/93-12/04         | 1.02 (0.98, 1.06)        | 0.30   | 1.02 (0.98, 1.06)       | 0.35   | 1.06 (1.00, 1.12)          | 0.04   |
| NO <sub>2</sub> Jefferson St.                   | 8/98-12/04         | 1.02 (0.94, 1.10)        | 0.70   | 1.04 (0.97, 1.11)       | 0.30   | 1.02 (0.92, 1.13)          | 0.74   |
| NO <sub>2</sub> Tucker                          | 4/95-12/04         | 1.01 (0.96, 1.07)        | 0.62   | 1.00 (0.94, 1.05)       | 0.87   | 1.07 (1.00, 1.15)          | 0.06   |
| NO <sub>2</sub> South DeKalb                    | 9/93-12/04         | 1.00 (0.95, 1.04)        | 0.87   | 1.01 (0.96, 1.05)       | 0.80   | 1.06 (0.99, 1.12)          | 0.08   |
| O <sub>3</sub> Confederate Ave.                 | 9/93-12/04‡        | 0.91 (0.78, 1.07)        | 0.91   | 0.97 (0.88, 1.07)       | 0.51   | 1.00 (0.80, 1.24)          | 0.99   |
| O <sub>3</sub> South DeKalb                     | 9/93-12/04‡        | 1.03 (0.75, 1.42)        | 0.84   | 1.12 (0.97, 1.28)       | 0.12   | 0.87 (0.63, 1.20)          | 0.39   |
| O <sub>3</sub> Jefferson St.                    | 8/98-12/04         | 0.94 (0.76, 1.17)        | 0.60   | 0.97 (0.84, 1.12)       | 0.67   | 1.42 (1.05, 1.91)          | 0.02   |
| SO <sub>2</sub> Confederate Ave.                | 9/93-12/04         | 0.99 (0.95, 1.04)        | 0.83   | 0.96 (0.91, 1.00)       | 0.04   | 0.96 (0.91, 1.02)          | 0.24   |
| SO <sub>2</sub> Jefferson St.                   | 8/98-12/04         | 1.03 (0.96, 1.10)        | 0.39   | 1.03 (0.98, 1.09)       | 0.26   | 0.98 (0.92, 1.04)          | 0.53   |
| SO <sub>2</sub> Georgia Tech                    | 9/93-12/04         | 0.99 (0.93, 1.05)        | 0.63   | 1.01 (0.96, 1.06)       | 0.77   | 1.01 (0.95, 1.08)          | 0.71   |
| PM <sub>10</sub> Jefferson St.                  | 8/98-12/04         | 1.04 (0.85, 1.28)        | 0.67   | 1.11 (0.99, 1.24)       | 0.07   | 0.98 (0.73, 1.31)          | 0.88   |
| PM <sub>10</sub> Georgia Tech                   | 1/96-12/04         | 1.08 (0.99, 1.18)        | 0.10   | 1.03 (0.96, 1.12)       | 0.39   | 1.02 (0.89, 1.17)          | 0.78   |
| PM <sub>2.5</sub> Jefferson St.                 | 8/98-12/04         | 1.09 (0.98, 1.21)        | 0.11   | 1.06 (0.98, 1.14)       | 0.13   | 1.07 (0.92, 1.24)          | 0.41   |
| PM <sub>2.5</sub> Doraville Heath Center        | 3/99-12/04         | 0.86 (0.74, 1.01)        | 0.07   | 1.02 (0.93, 1.11)       | 0.69   | 1.10 (0.85, 1.43)          | 0.46   |
| PM <sub>2.5</sub> South DeKalb                  | 3/99-12/04         | 0.92 (0.79, 1.06)        | 0.26   | 0.95 (0.86, 1.04)       | 0.23   | 1.24 (0.89, 1.71)          | 0.20   |
| PM <sub>2.5</sub> Tucker                        | 3/99-12/04         | 0.92 (0.77, 1.09)        | 0.34   | 1.02 (0.93, 1.12)       | 0.69   | 1.00 (0.82, 1.23)          | 0.99   |
| PM <sub>2.5</sub> East Rivers School            | 3/99-12/04         | 0.94 (0.74, 1.20)        | 0.64   | 0.87 (0.77, 0.99)       | 0.03   | 1.08 (0.78, 1.49)          | 0.64   |
| PM <sub>2.5</sub> Fort McPherson                | 3/99-12/04         | 1.05 (0.90, 1.23)        | 0.53   | 0.98 (0.89, 1.08)       | 0.67   | 0.96 (0.76, 1.22)          | 0.73   |
| PM <sub>2.5-10</sub> Jefferson St.              | 8/98-12/04         | 1.03 (0.95, 1.12)        | 0.46   | 1.03 (0.97, 1.10)       | 0.30   | 1.07 (0.97, 1.18)          | 0.21   |
| PM <sub>2.5</sub> EC Jefferson St.              | 8/98-12/04         | 1.01 (0.93, 1.10)        | 0.76   | 1.04 (0.98, 1.10)       | 0.20   | 0.97 (0.86, 1.08)          | 0.55   |
| PM <sub>2.5</sub> NO <sub>3</sub> Jefferson St. | 8/98-12/04         | 1.03 (0.89, 1.20)        | 0.68   | 0.98 (0.90, 1.08)       | 0.73   | 0.86 (0.71, 1.04)          | 0.11   |
| PM <sub>2.5</sub> OC Jefferson St.              | 8/98-12/04         | 1.02 (0.94, 1.10)        | 0.66   | 1.01 (0.95, 1.08)       | 0.75   | 0.98 (0.89, 1.07)          | 0.62   |
| PM <sub>2.5</sub> SO <sub>4</sub> Jefferson St. | 8/98-12/04         | 1.06 (0.94, 1.20)        | 0.32   | 1.09 (1.01, 1.19)       | 0.03   | 0.93 (0.77, 1.11)          | 0.42   |
| PM <sub>2.5</sub> TC Jefferson St.              | 8/98-12/04         | 1.02 (0.95, 1.09)        | 0.67   | 1.02 (0.96, 1.09)       | 0.53   | 0.97 (0.88, 1.08)          | 0.59   |
| PM <sub>2.5</sub> WS metals Jefferson St.       | 8/98-12/04         | 1.07 (0.93, 1.24)        | 0.32   | 1.11 (1.02, 1.22)       | 0.02   | 0.89 (0.72, 1.09)          | 0.26   |

\* Risk ratio and 95% CI's corresponds to a window-specific IQR increase in pollutant levels (shown in Table 2).

† Pooled inverse-variance weighted risk ratios for each pollutant and exposure window presented in Table 4.

‡ Did not operate in winter months

## eAppendix. Description of population-weighted spatial averaging

In the five-county analyses, daily pollutant concentrations were characterized using a population-weighted spatial average of measurements from all air quality monitors in the study area. We calculated the daily population-weighted spatial averages using the following approach, described in detail by Ivy and colleagues.<sup>1</sup>

1. First, log-transformed pollutant values, on each day,  $k$ , at each monitoring station,  $i$ , were standardized using the annual mean and standard deviation at the monitor

$$\beta_{i,k} = \frac{(x_{i,k} - E(x_i))}{\sqrt{\text{var}(x_i)}}$$

where  $\beta_{i,k}$  is the standardized pollutant value at monitor  $i$  on day  $k$ ,  $x_{i,k}$  is the log-transformed pollutant concentration at monitor  $i$  on day  $k$ , the annual mean of  $\beta_i=0$ , the annual variance of  $\beta_i=1$

2. For each census tract in the study area we created a distance-weighted average of the standardized values from each monitoring station
3. We then converted the standardized value at each census tract back into a pollutant concentration using pollutant-specific distance-decay functions from the most central urban monitor
4. Finally we averaged the pollution values across census tracts, weighting by population counts from the 2000 census

$$C_k = \frac{\sum_j C_{j,k} P_j}{\sum_j P_j}$$

where  $C_k$  is the population-weighted concentration for the five-county Atlanta area on day  $k$ ,  $P_j$  is the population in census track  $j$ , and  $C_{j,k}$  is the concentration in census tract  $j$  on day  $k$

1. Ivy D, Mulholland J, Russell A. Development of Ambient Air Quality Population-Weighted Metrics for Use in Time-Series Health Studies. *J Air Waste Manage Assoc* 2008;**58**:711-720.

Item not required



Item not required
